# Supplementary material for: Biodegradable copper–metformin nanoscale coordination polymers for enhanced chemo/chemodynamic synergistic therapy by reducing oxygen consumption to promote H2O2 accumulation
Source: Royal Society of Chemistry journal article supplement (doi:10.1039/d0tb02476g), 2021-01-01
Supplement: d0tb02476g1.pdf [file d0tb02476g1.pdf]

## Supplementary Materials

### **Biodegradable copper-metformin nanoscale coordination polymer for enhanced chemo/chemodynamic synergistic therapy by reducing oxygen consumption to promote H<sub>2</sub>O<sub>2</sub> accumulation**

*Xiangyu Meng*<sup>1</sup>, *Xuezhong Zhang*<sup>1</sup>, *Yunfeng Lei*<sup>1</sup>,

*Dongwei Cao*<sup>2,3,\*</sup>, *Zhifei Wang*<sup>1,\*</sup>

<sup>1</sup> School of Chemistry and Chemical Engineering, Southeast University, Nanjing 211189, Jiangsu, PR China

<sup>2</sup> Department of Nephrology, Nanjing Drum Tower Hospital, The Affiliated Hospital of Nanjing University Medical School, Nanjing, 210008, Jiangsu, PR China

<sup>3</sup> Department of Nephrology, Nanjing Drum Tower Hospital Clinical College of Nanjing Medical University, Nanjing, 210008, Jiangsu, PR China

\* Corresponding author:

Dr. Dongwei Cao, E-mail address: cdwlqq@hotmail.com

Dr. Zhifei Wang, E-mail address: zfwang@seu.edu.cn

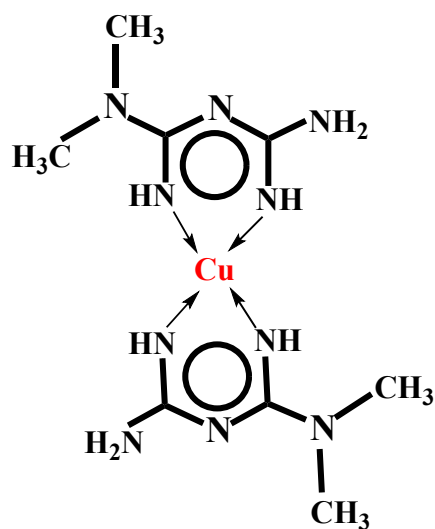

**Fig. S1.** The coordination interaction between copper ions and the imines groups of Met to form Cu–N bonds.

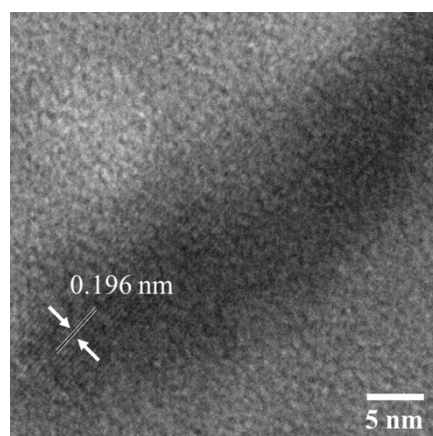

**Fig. S2.** The high-resolution TEM (HRTEM) of Cu-Met NPs.

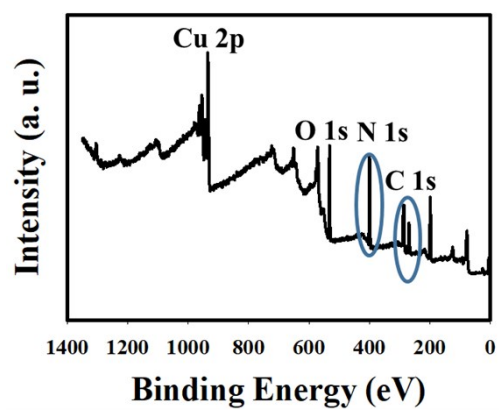

**Fig. S3.** XPS result of Cu-Met NPs.

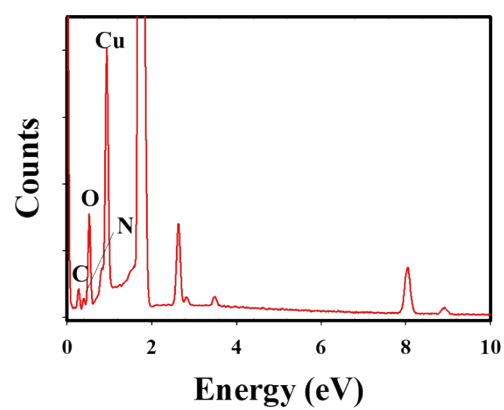

**Fig. S4.** EDS spectrum of Dox@Cu-Met NPs.

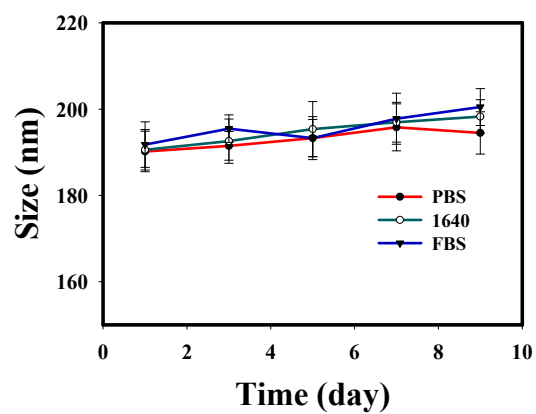

**Fig. S5.** The size of Dox@Cu-Met NPs during 9-day soaking in simulated PBS, 1640 medium and fetal bovine serum (FBS). Error bars indicate standard deviation ( $n = 3$ ).

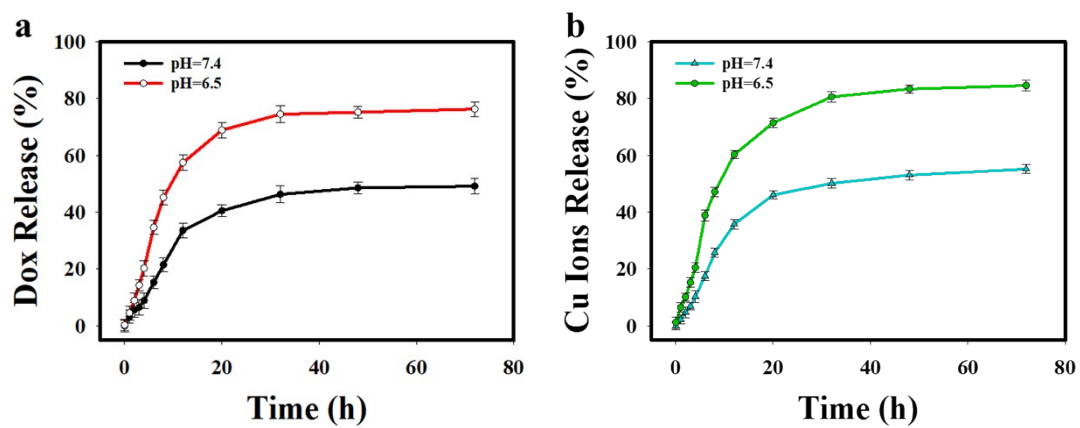

**Fig. S6.** Accumulated releasing Dox (a) and Cu ions (b) from Dox@Cu-Met NPs (200  $\mu\text{g/mL}$ ) at different pH value with 5 mM GSH.

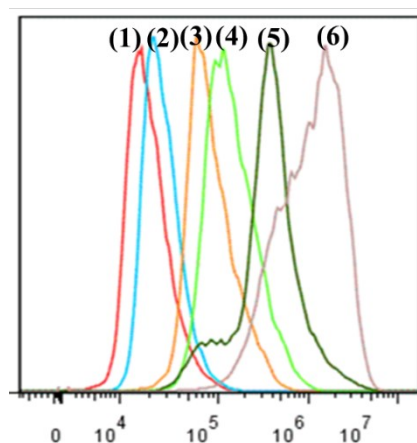

**Fig. S7.** Flow cytometry analysis of ROS production in MCF-7 cells after treatment with treated with (1) PBS, (2) Dox, (3) Met, (4) Dox@Cu-Met NPs + BSO (100  $\mu$ M), (5) Cu-Met NPs, or (6) Dox@Cu-Met NPs.



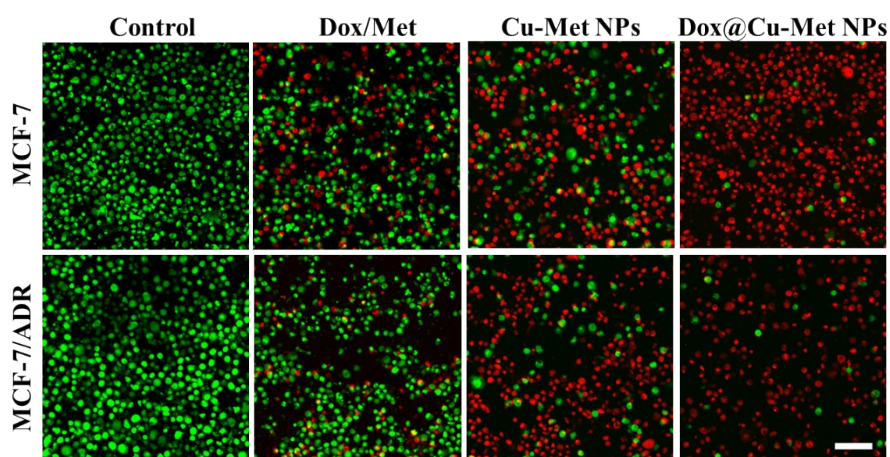

**Fig. S8.** Live/Dead cell staining of MCF-7 cells and MCF-7/ADR after incubation with Dox (2  $\mu\text{g/mL}$ ) /Met (0.2  $\text{mg/mL}$ ), Cu-Met NPs (50  $\mu\text{g/mL}$ ), and Dox@Cu-Met NPs (50  $\mu\text{g/mL}$ ). Scale bar = 100  $\mu\text{m}$ .

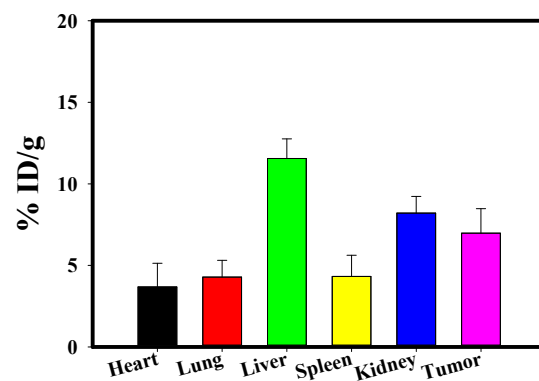

**Fig. S9.** The distribution content of Cu in the major organs (heart, liver, spleens, lungs, and kidney) and tumors of breast tumor-bearing mice after intravenous injection Dox@Cu-Met NPs for 24 h. Error bars indicate standard deviation (n = 3).

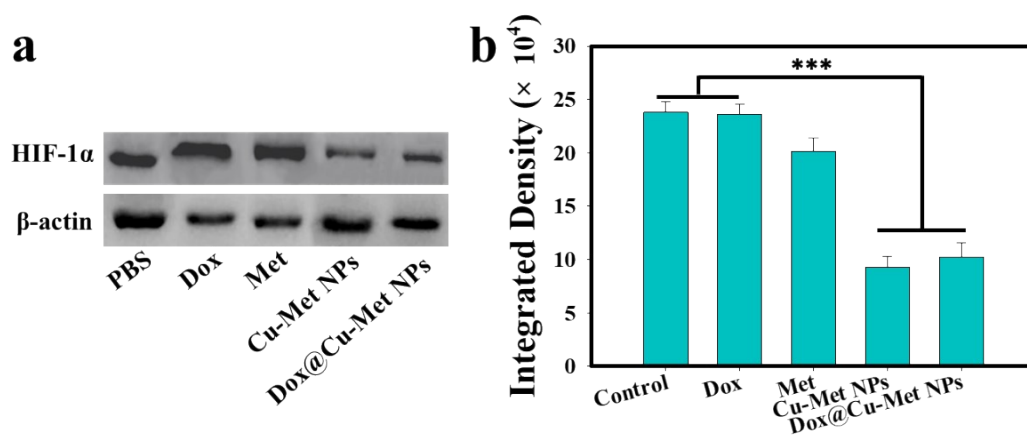

**Fig. S10.** (a) Western blot assay of HIF-1 $\alpha$  levels in tumor tissues of mice after treated with Dox, Met, Cu-Met NPs, or Dox@Cu-Met NPs. (b) Quantitative analysis of relative HIF-1 $\alpha$  expression in tumor tissues of mice according to (a).

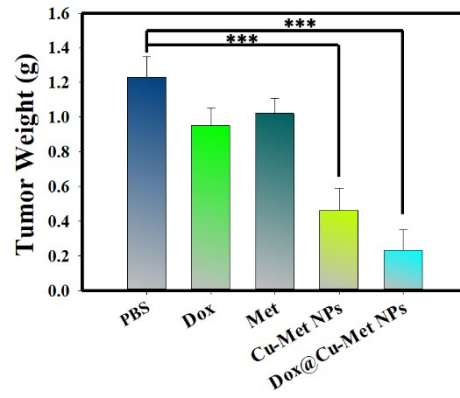

**Fig. S11.** Tumor weight of breast tumor-bearing mice intravenous injection with PBS, Dox, Met, Cu-Met NPs, and Dox@Cu-Met NPs after a 14-day treatment. \*\*\* $p < 0.001$ , \*\* $p < 0.01$ , or \* $p < 0.05$ . Error bars indicate standard deviation ( $n = 3$ ).

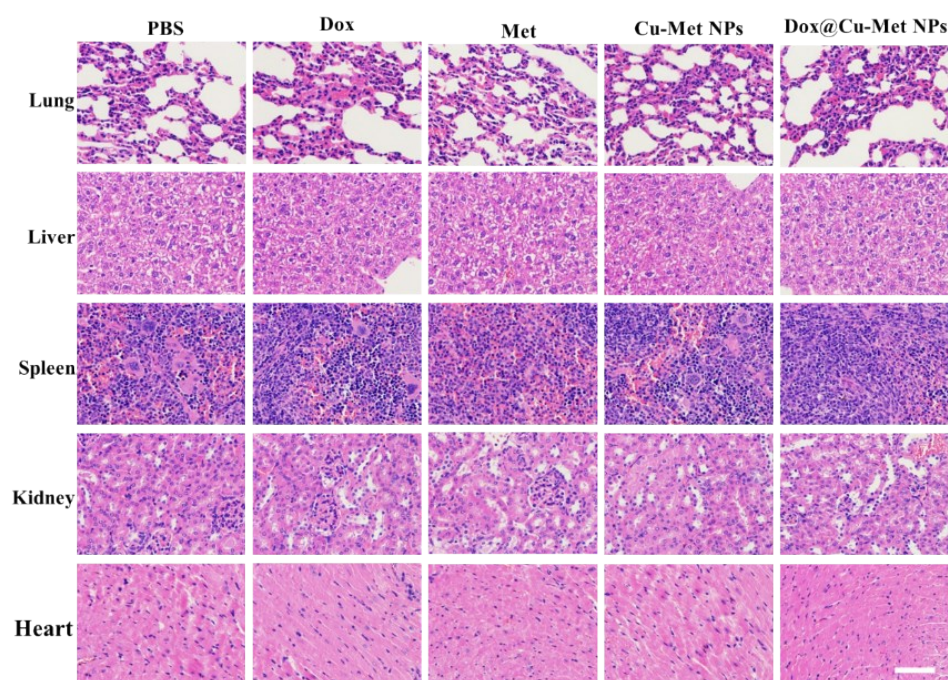

**Fig. S12.** H&E staining of the main organs after the mice treated with PBS, Dox, Met, Cu-Met NPs, Dox@Cu-Met NPs. Scale bar = 50  $\mu$ m.

**Table S1.** The main hematology analysis and blood biochemistry analysis of mice treated with Dox@Cu-Met NPs after 14-day treatment.

| Index                            | Blank              | 2.5mg/kg           | Ratio 1 | 5 mg/kg            | Ratio 2 |
|----------------------------------|--------------------|--------------------|---------|--------------------|---------|
| WBC ( $10^9 \text{ L}^{-1}$ )    | $4.69 \pm 2.13$    | $4.57 \pm 1.67$    | 0.97    | $4.66 \pm 3.15$    | 0.99    |
| RBC ( $10^{12} \text{ L}^{-1}$ ) | $11.02 \pm 0.98$   | $11.32 \pm 1.11$   | 1.03    | $11.23 \pm 1.23$   | 1.02    |
| PLT ( $10^9 \text{ L}^{-1}$ )    | $778.5 \pm 100.5$  | $753 \pm 103.2$    | 0.97    | $761.2 \pm 99.4$   | 0.97    |
| HGB (g/L)                        | $167.3 \pm 9.8$    | $170.3 \pm 6.5$    | 1.01    | $168.56 \pm 7.3$   | 1.01    |
| HCT (%)                          | $0.51 \pm 0.05$    | $0.49 \pm 0.042$   | 0.96    | $0.52 \pm 0.04$    | 1.01    |
| MCH (pg)                         | $14.85 \pm 0.51$   | $14.15 \pm 0.52$   | 0.95    | $14.38 \pm 0.49$   | 0.97    |
| LY (%)                           | $89.91 \pm 1.79$   | $90.15 \pm 1.15$   | 1.00    | $89.73 \pm 0.92$   | 0.99    |
| NE (%)                           | $1.23 \pm 1.17$    | $1.31 \pm 1.21$    | 1.07    | $1.29 \pm 1.23$    | 1.05    |
| MPV (fL)                         | $2.08 \pm 3.27$    | $2.01 \pm 2.77$    | 0.97    | $2.06 \pm 2.69$    | 0.99    |
| ALB (g/L)                        | $35.86 \pm 1.54$   | $35.15 \pm 3.67$   | 0.98    | $35.99 \pm 1.61$   | 1.00    |
| TP (g/L)                         | $60.43 \pm 2.10$   | $62.98 \pm 3.21$   | 1.04    | $61.33 \pm 2.09$   | 1.01    |
| ALT(U/L)                         | $95.68 \pm 32.49$  | $95.37 \pm 30.49$  | 0.99    | $95.03 \pm 38.67$  | 0.99    |
| AST (U/L)                        | $178.77 \pm 35.01$ | $180.26 \pm 33.95$ | 1.01    | $175.68 \pm 39.46$ | 0.98    |
| GLO (mmol/L)                     | $4.68 \pm 2.84$    | $4.59 \pm 2.71$    | 0.98    | $4.37 \pm 2.64$    | 0.93    |
| BUN (mmol/L)                     | $7.87 \pm 1.65$    | $7.89 \pm 1.43$    | 1.00    | $7.65 \pm 1.38$    | 0.97    |
| CRE ( $\mu\text{mol/L}$ )        | $20.43 \pm 5.09$   | $20.98 \pm 4.69$   | 1.03    | $20.75 \pm 4.77$   | 1.02    |

**Note:** Ratio 1 = Blank/(2.5 mg/kg); Ratio 2 = Blank/(5mg/kg).

White blood cells (WBC), red blood cell (RBC), platelets (PLT), hemoglobin (HGB), hematocrit (HCT), mean corpuscular hemoglobin (MCH), lymphocyte count (LY), neutrophil count (NE), mean platelet volume (MPV), globulin (GOL), Albumin (ALB), ALB/GLOB Ratio, alanine aminotransferase (ALT), aspartate aminotransferase (AST), blood urea nitrogen (BUN), creatinine (CREA), and total protein (TP).
